# Supplementary material for: Protein Tyrosine Phosphatase-1B Inhibition Disrupts IL13Rα2-Promoted Invasion and Metastasis in Cancer Cells
Source: MDPI journal article supplement (doi:10.3390/cancers12020500), 2020-02-21

**Figure 1B (right)**

**WB: PTP1B**

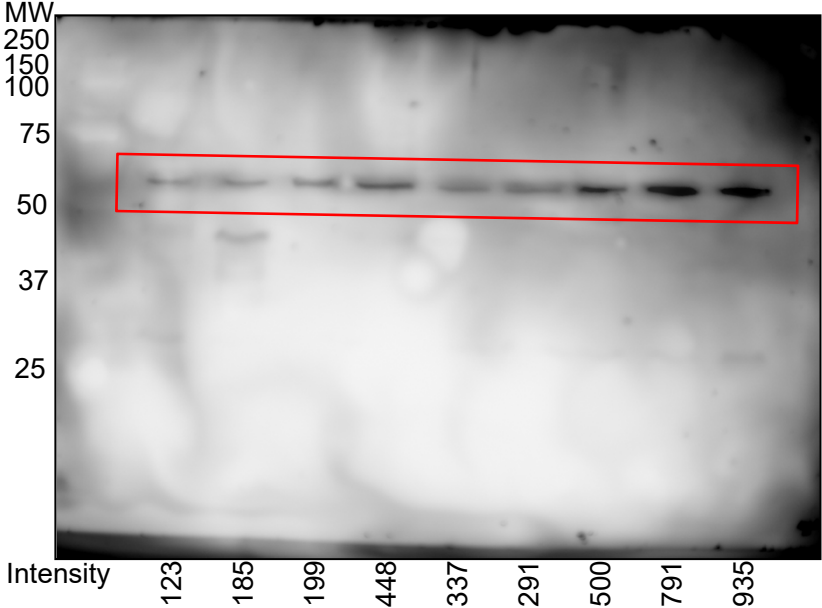

**Figure 1B (left)**

**WB: PTP1B**

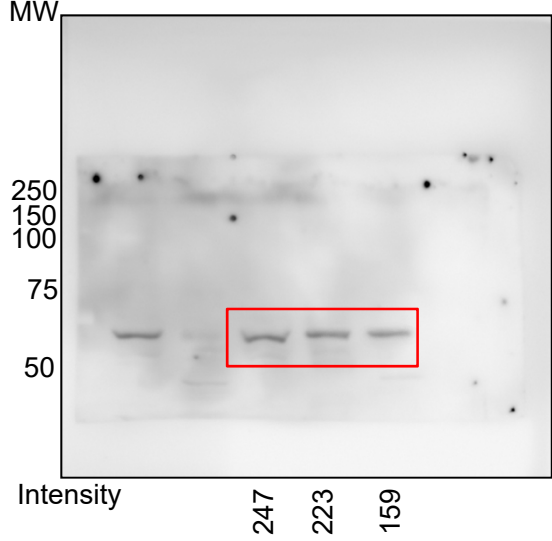

**WB: RhoGDI**

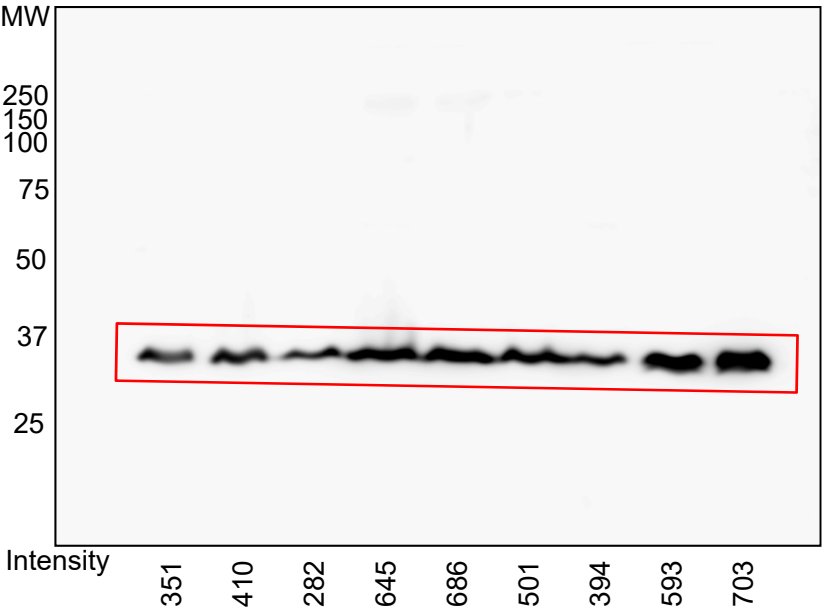

**WB: RhoGDI**

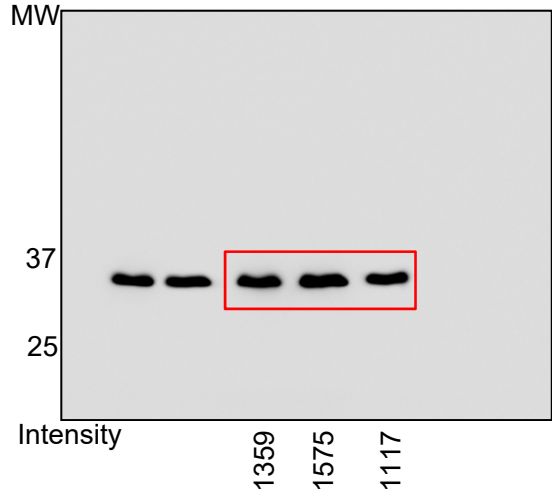

**Figure 1C (up, right)**

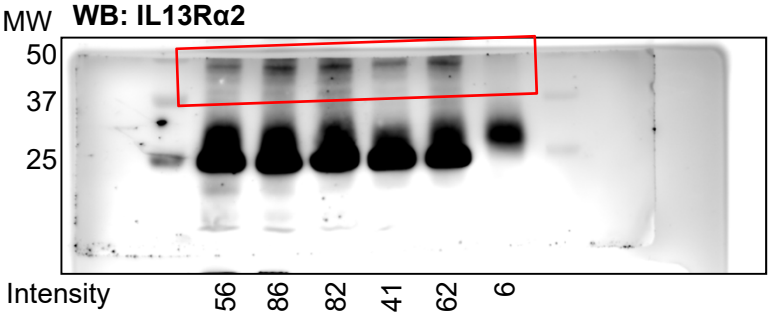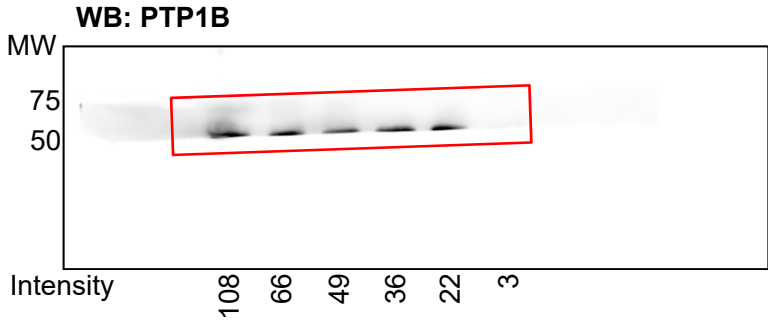

Figure 1C (up, left)

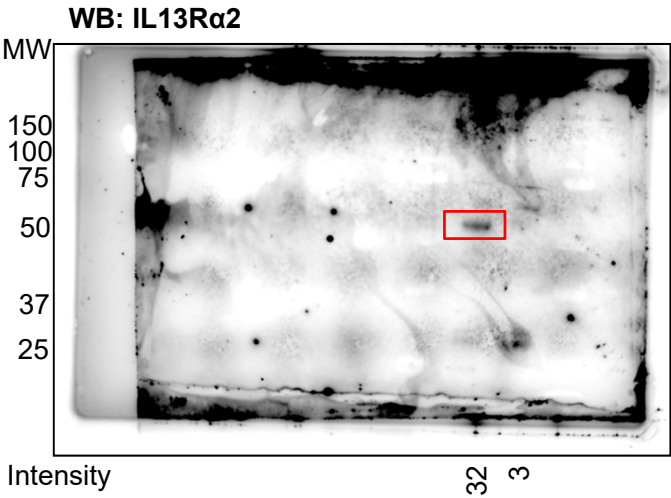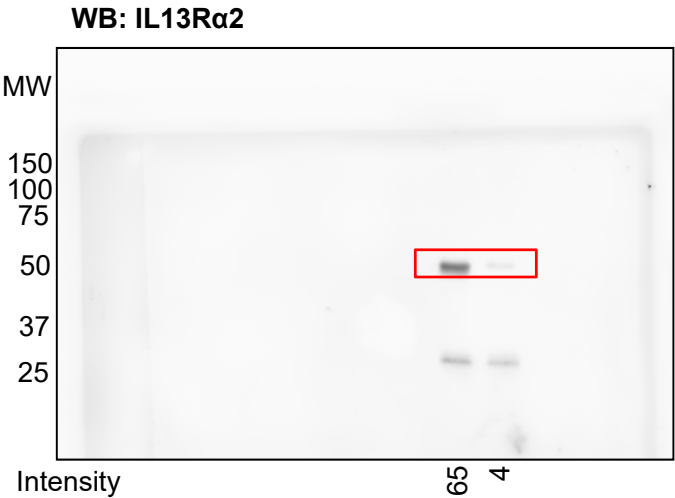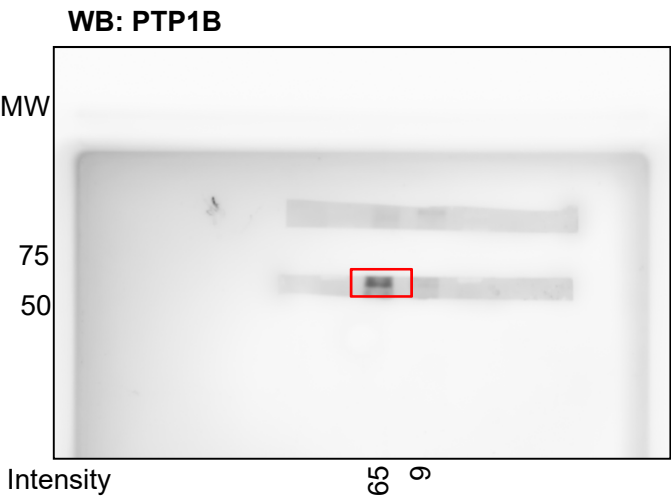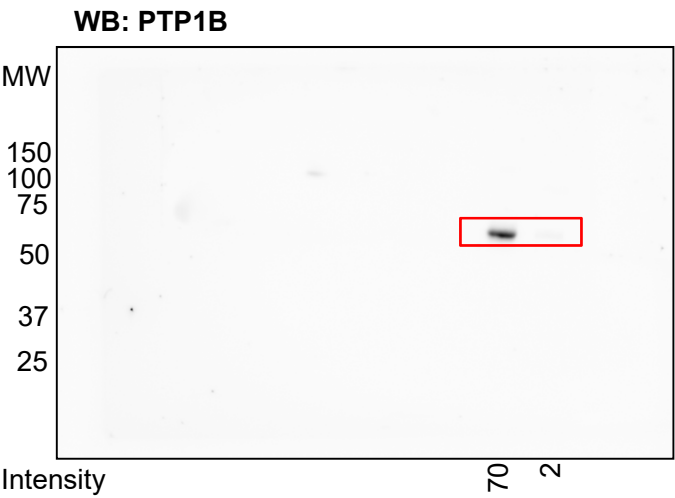

**Figure 1C (down, right)**

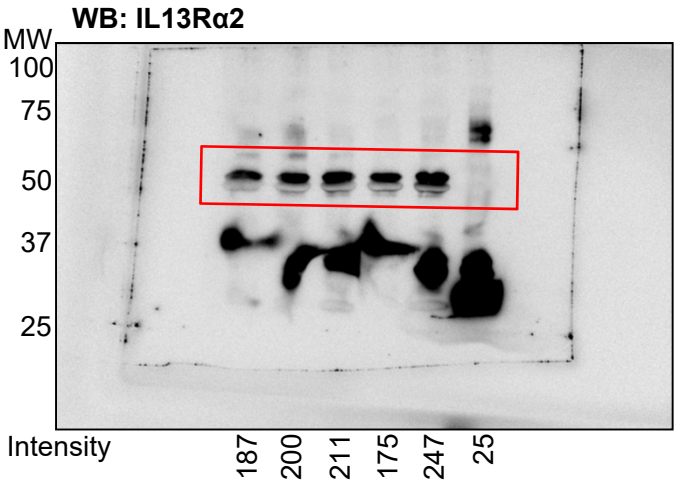

**Figure 1C (down, left)**

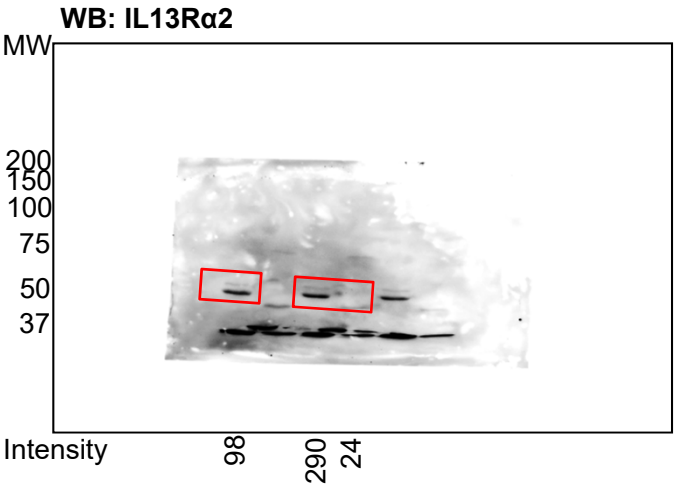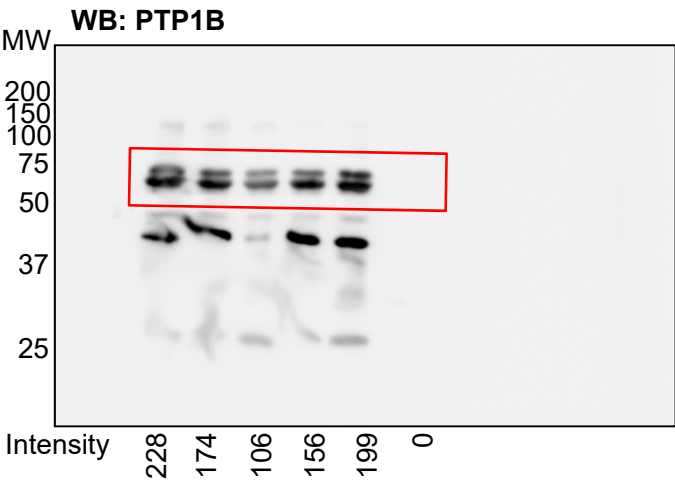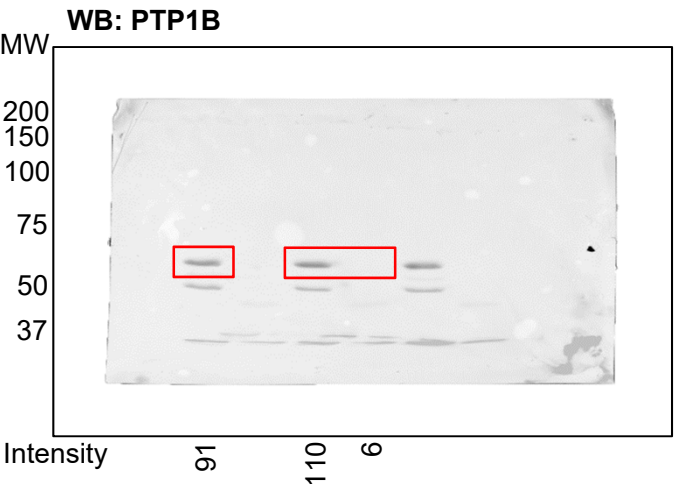

**Figure 1E (up)**

**WB: PTP1B**

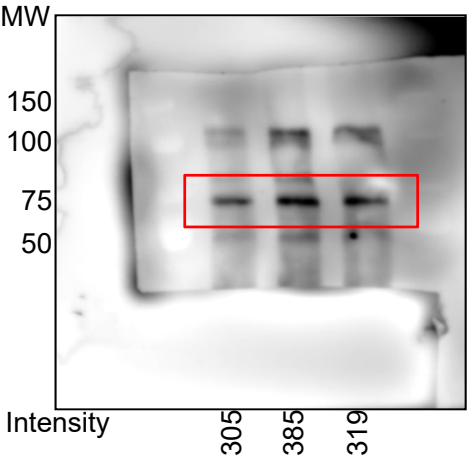

**Figure 1E (down)**

**WB: PTP1B**

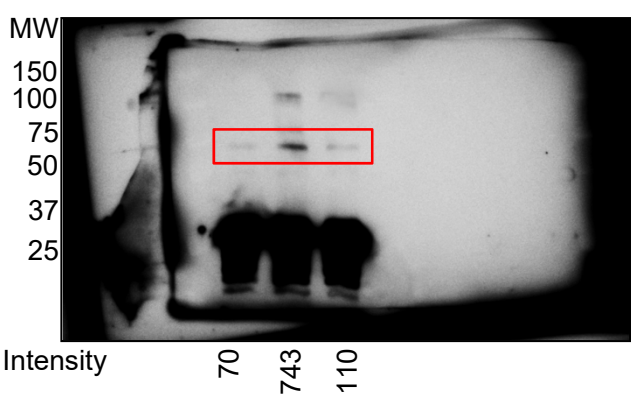

**WB: IL13Rα2**

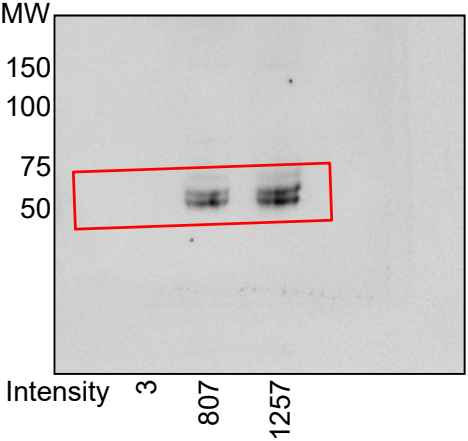

**WB: IL13Rα2**

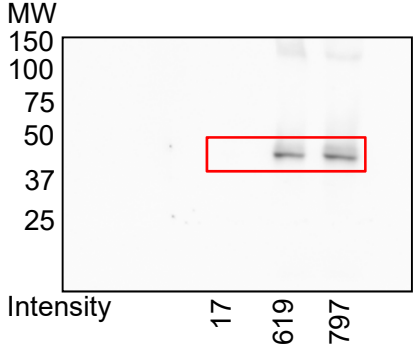

**WB: RhoGDI**

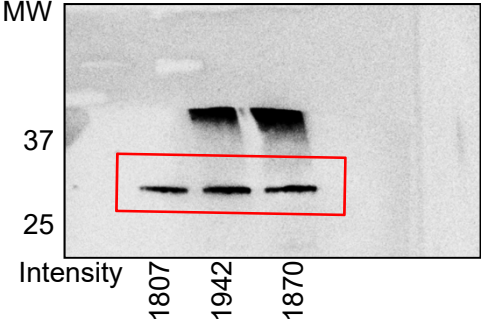

**Figure 4A (left)**

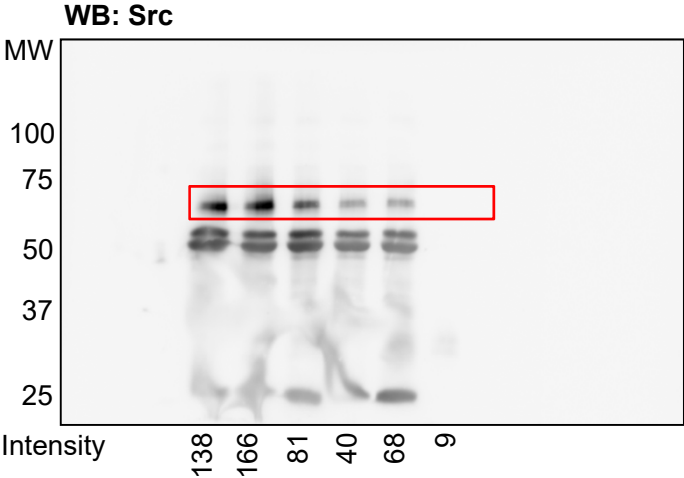

**Figure 4B (center)**

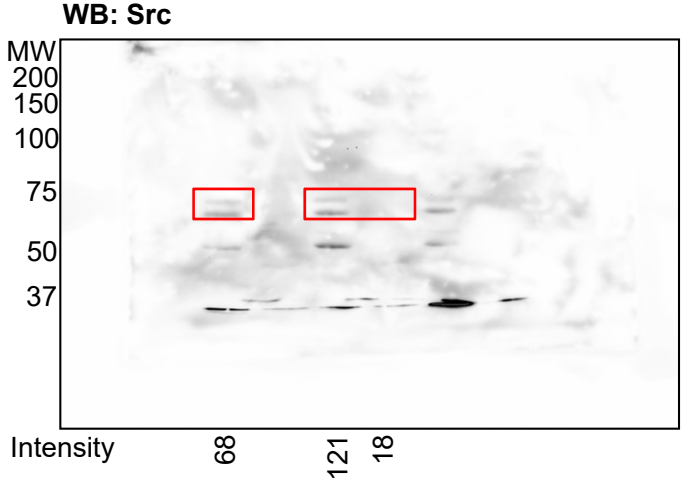

**WB: PTP1B**

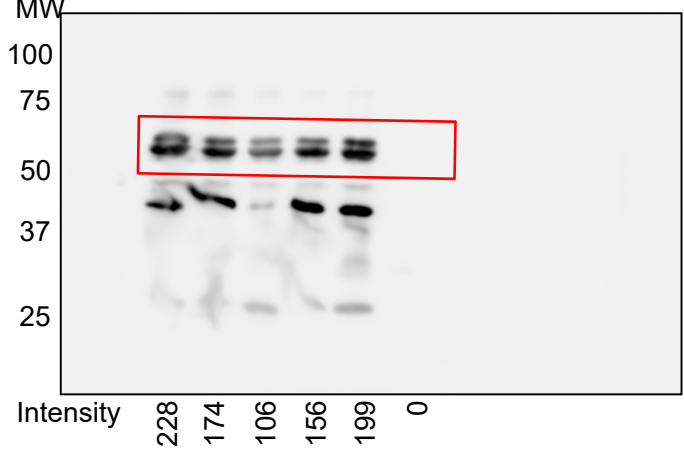

**WB: PTP1B**

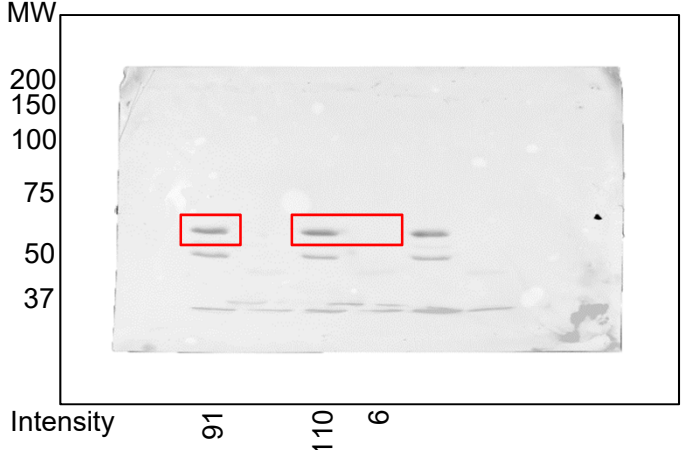

**Figure 3A (up)**

**WB: PTP1B**

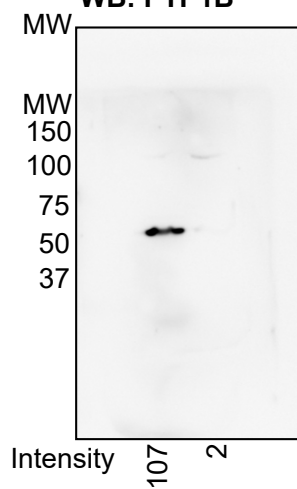

**Figure 3A (center)**

**WB: PTP1B**

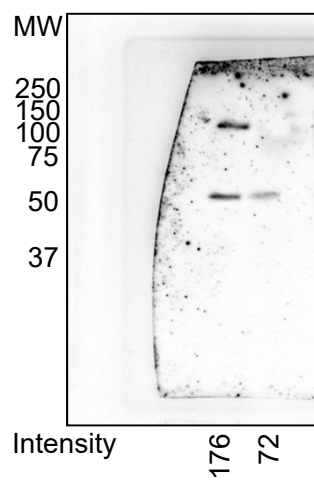

**Figure 3A (down)**

**WB: PTP1B**

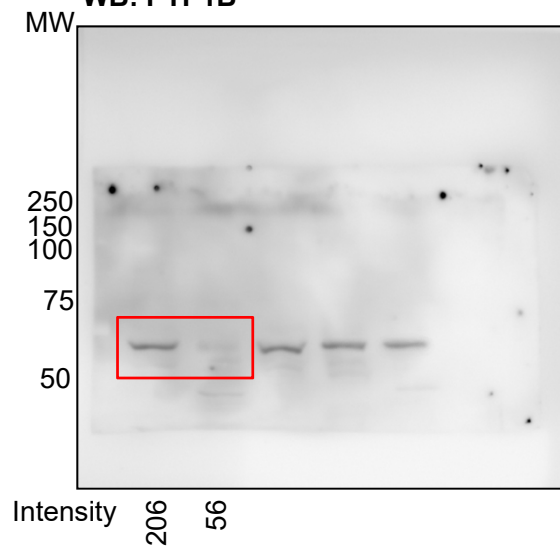

**WB: RhoGDI**

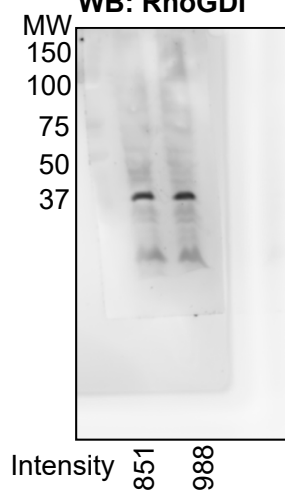

**WB: RhoGDI**

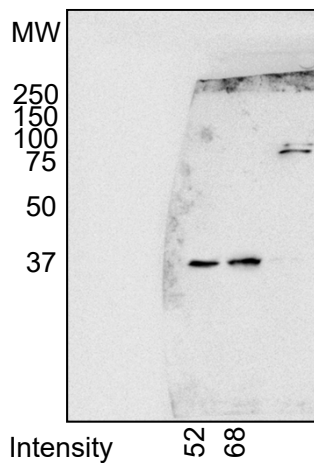

**WB: RhoGDI**

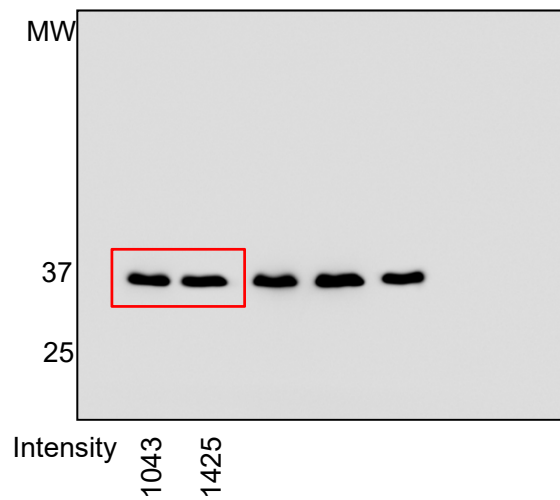

**Figure 4B (left)**

**WB: pY530-Src**

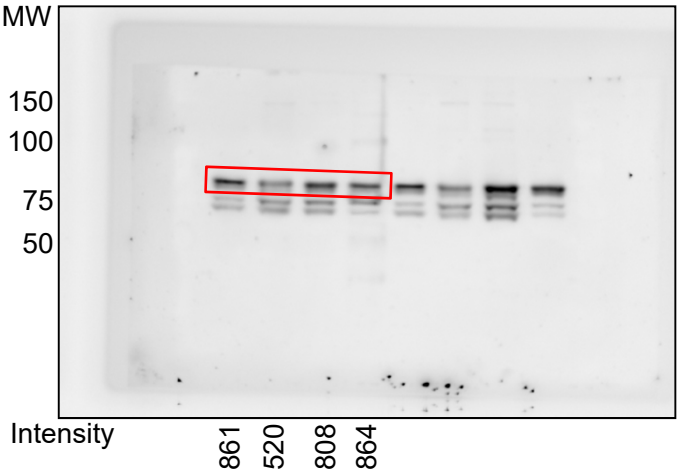

**Figure 4B (center)**

**WB: pY530-Src**

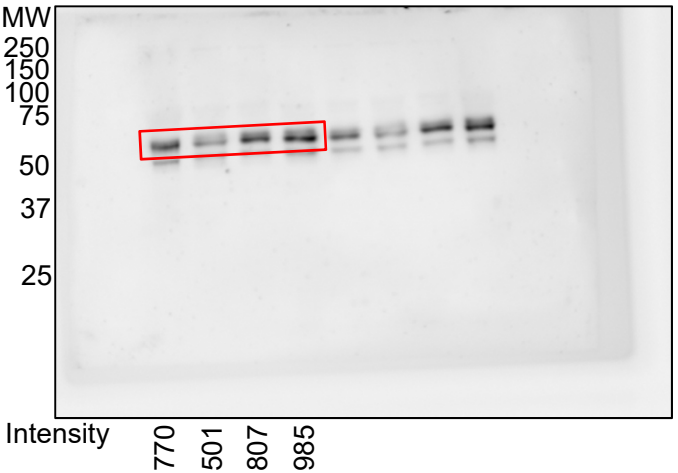

**WB: Src**

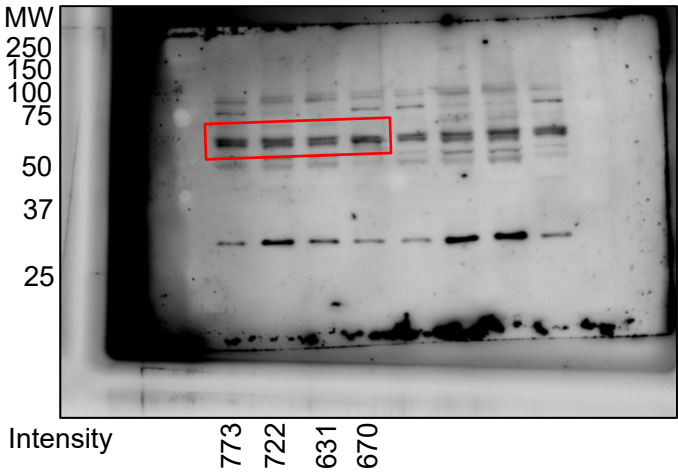

**WB: Src**

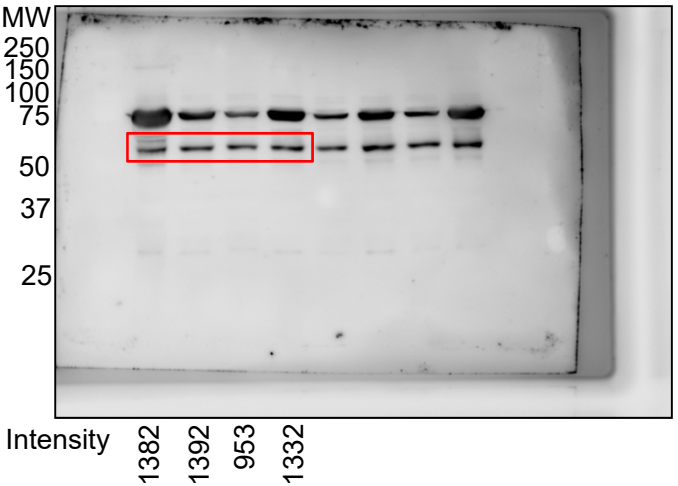



**Figure 4B (left)**

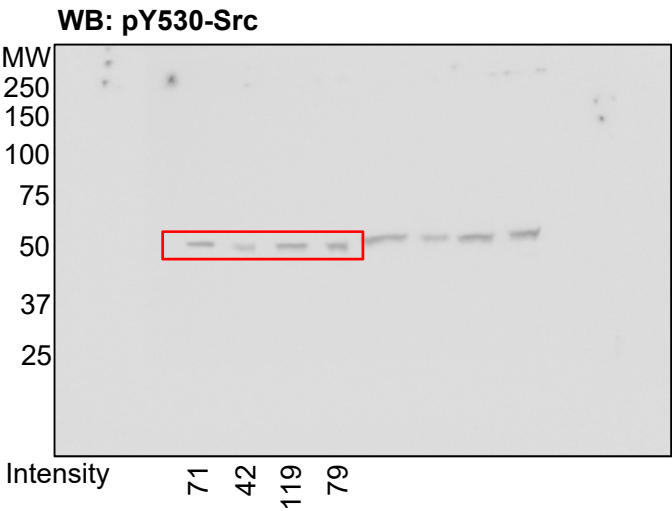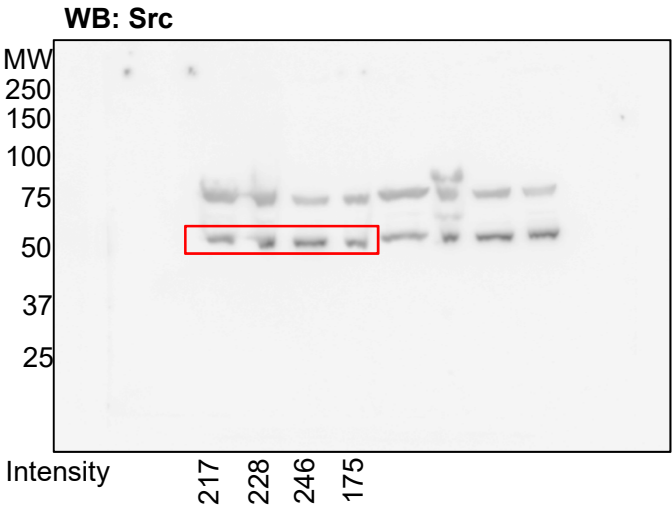

**Figure 4C (left)**

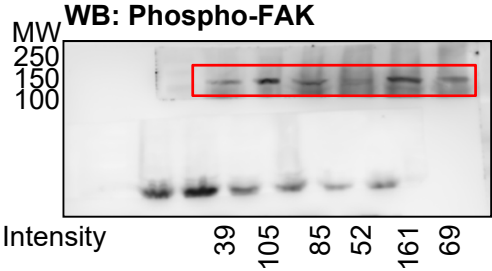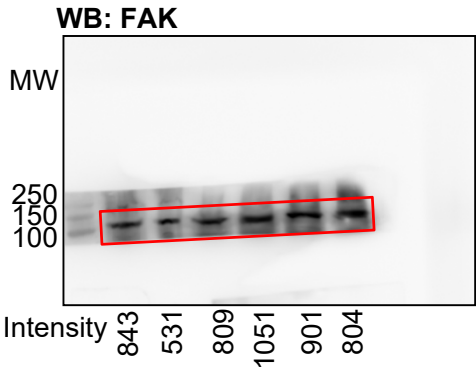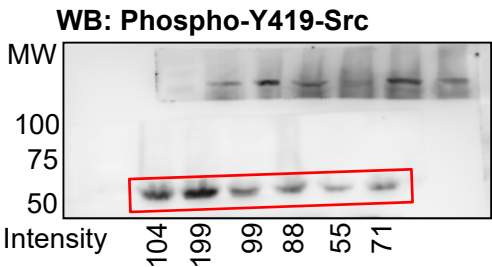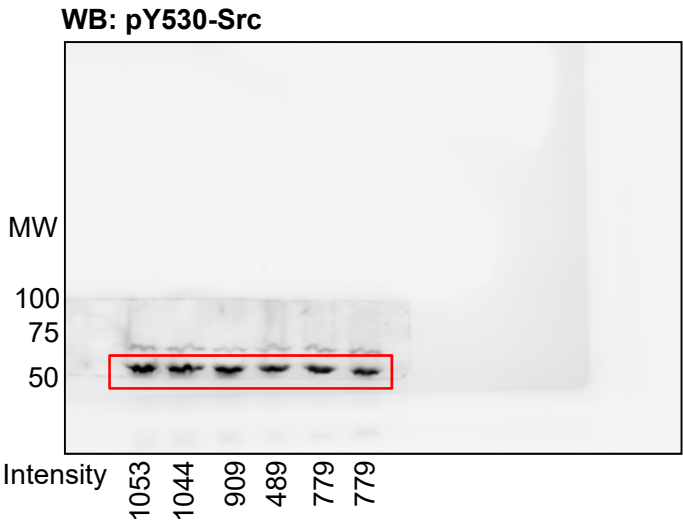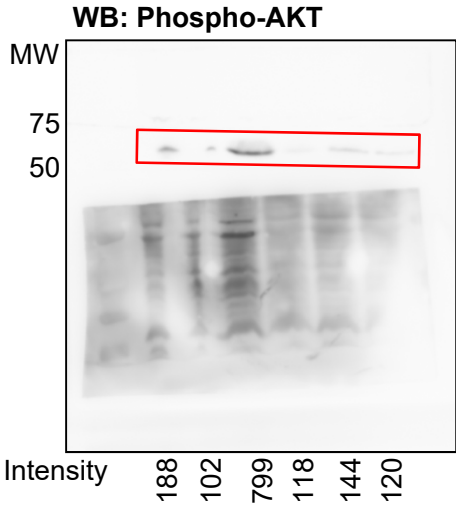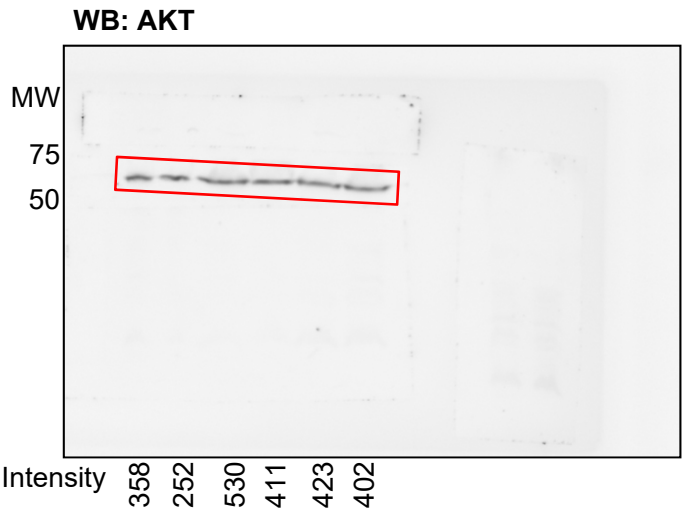

**Figure 4C (left)**

**WB: Phospho-EKR1/2**

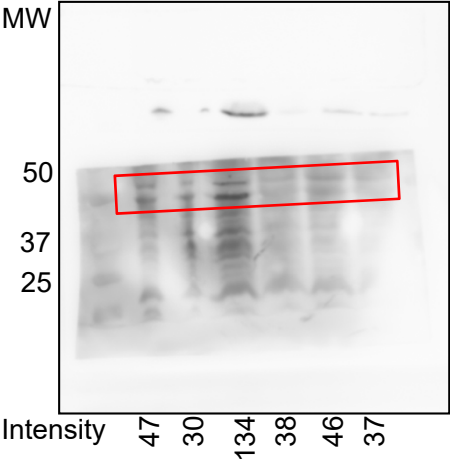

**WB: ERK1/2**

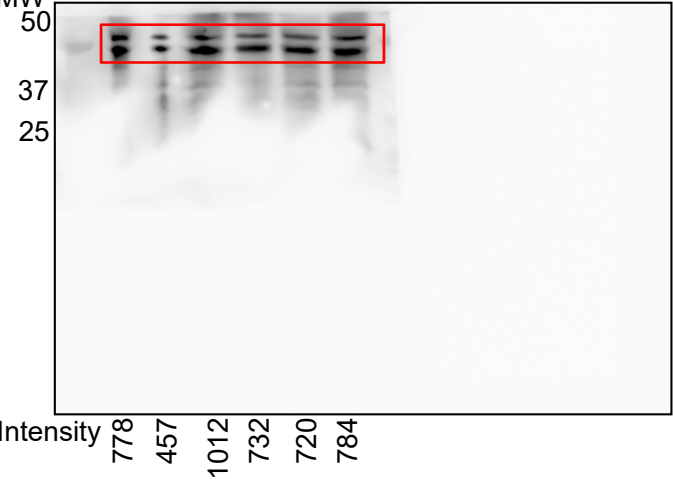

**WB: RhoGDI**

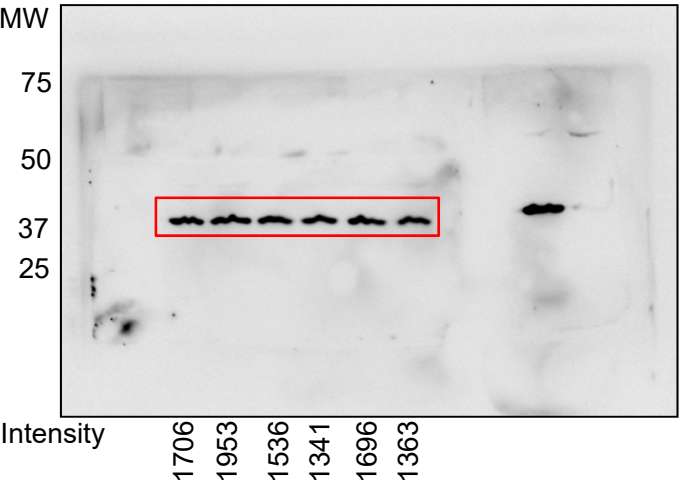

**Figure 4C (right)**

**WB: Phospho-FAK**

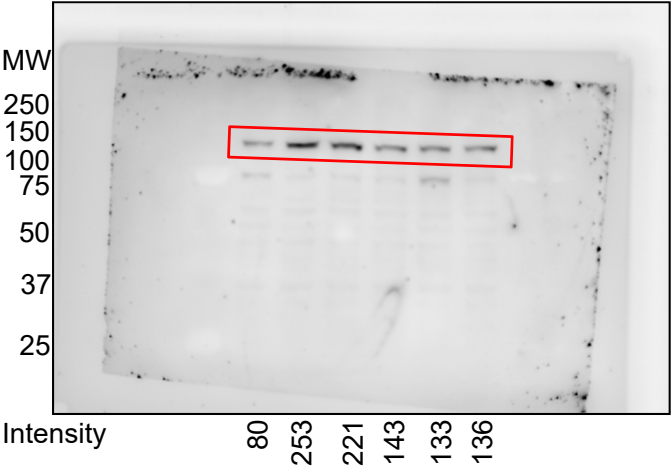

**WB: Src**

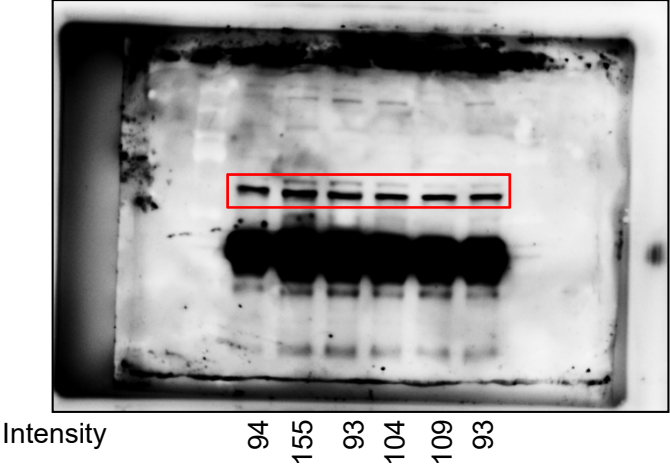

**WB: FAK**

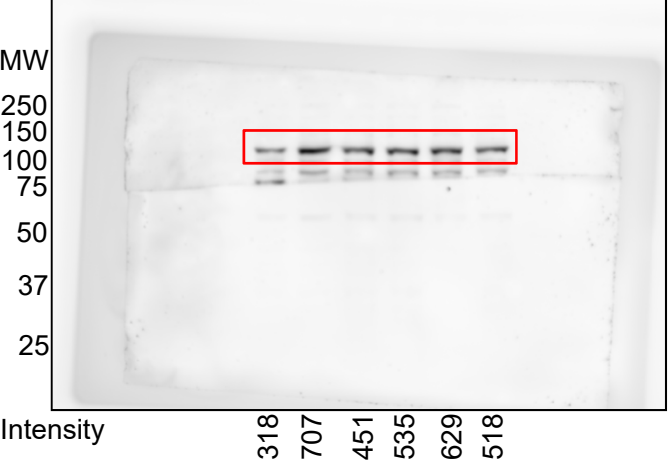

**WB: Phospho-AKT**

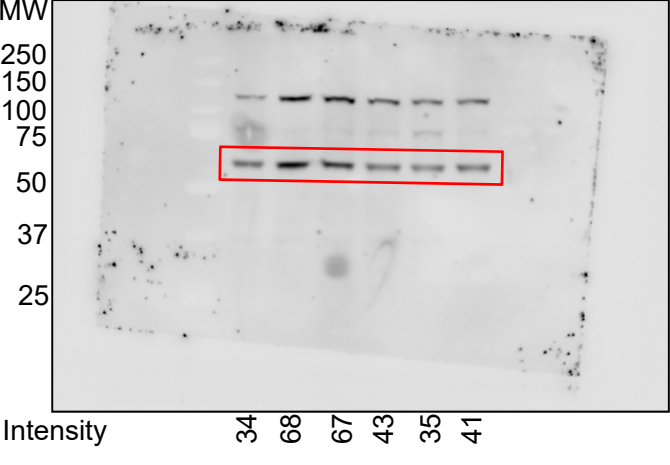

**WB: Phospho-Y419-Src**

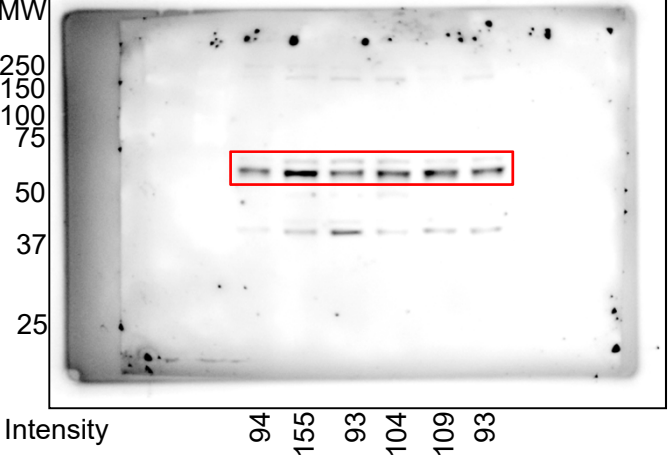

**WB: AKT**

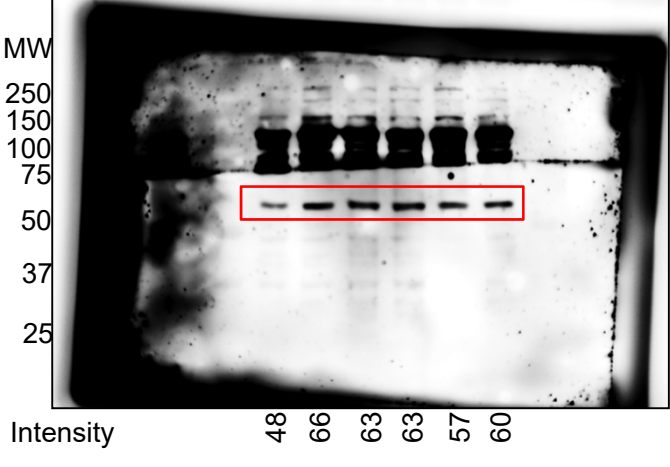

**Figure 4C (right)**

**WB: Phospho-EKR1/2**

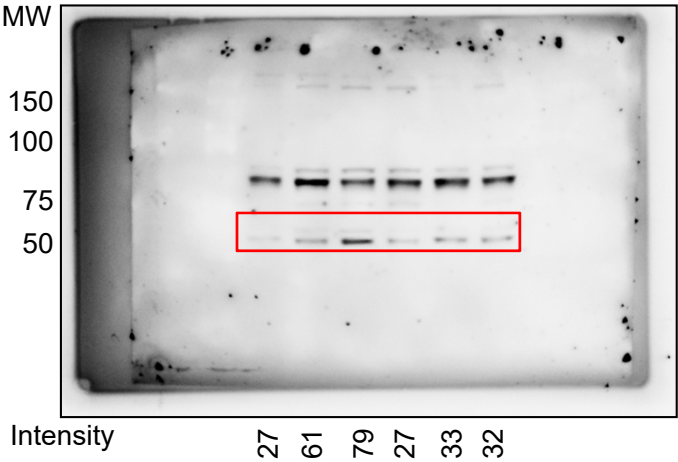

**WB: ERK1/2**

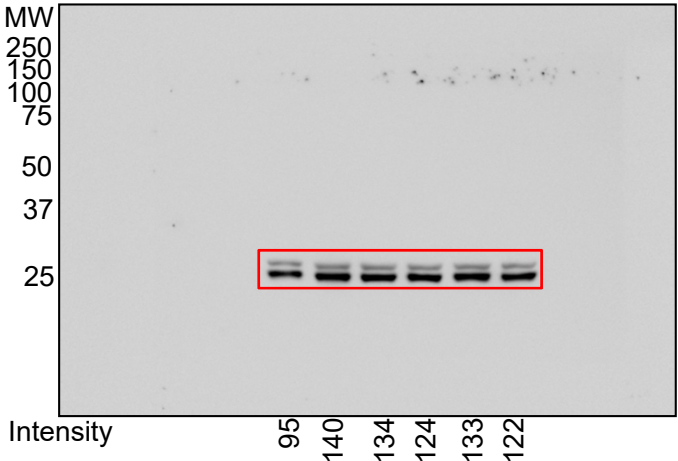

**WB: RhoGDI**

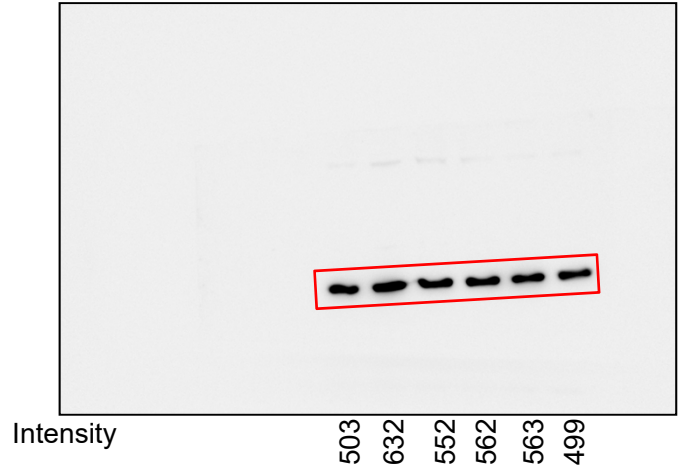

**Figure 5A (up)**

**WB: pY530-Src**

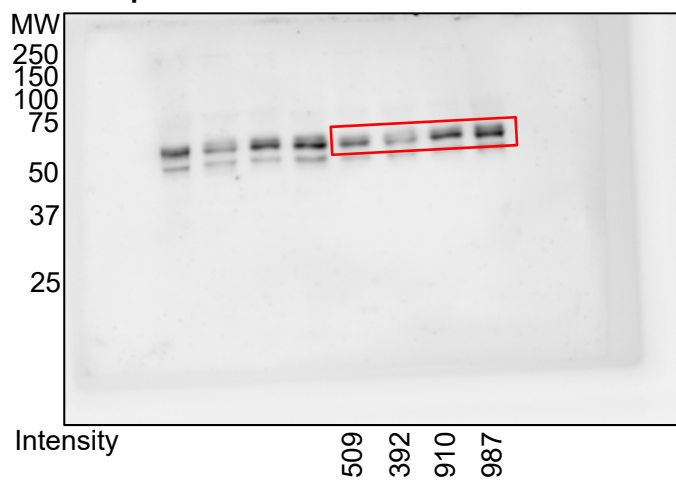

**Figure 5A (center)**

**WB: pY530-Src**

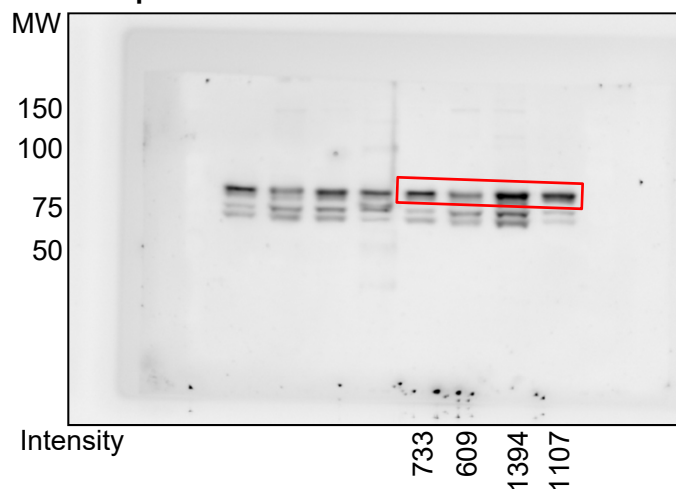

**WB: Src**

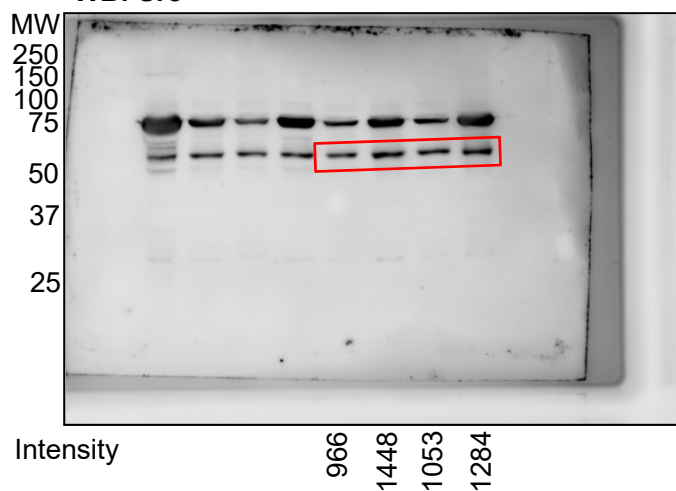

**WB: Src**

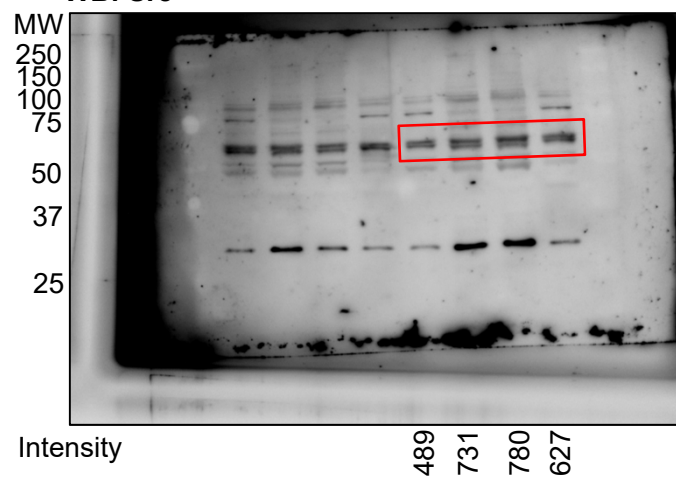

Figure 5A (down)

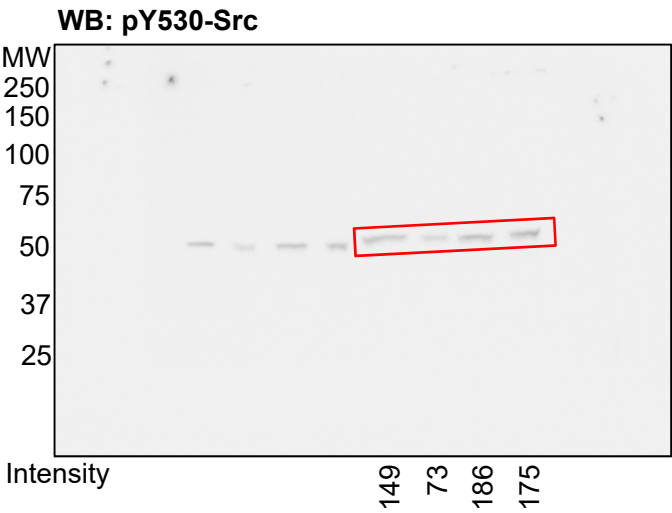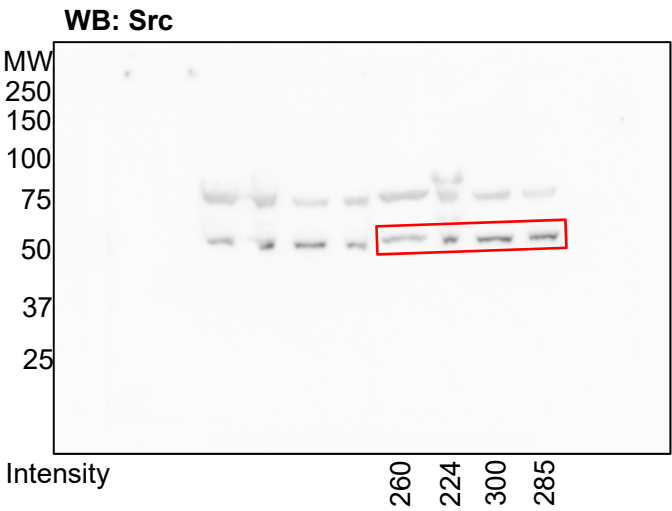

**Figure 6A**

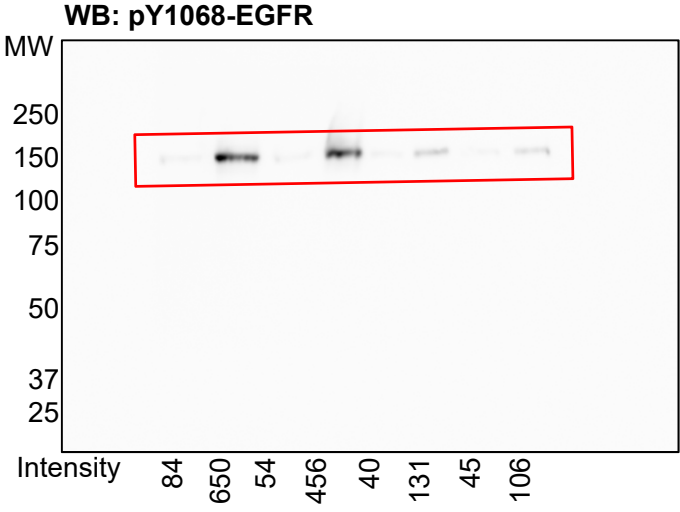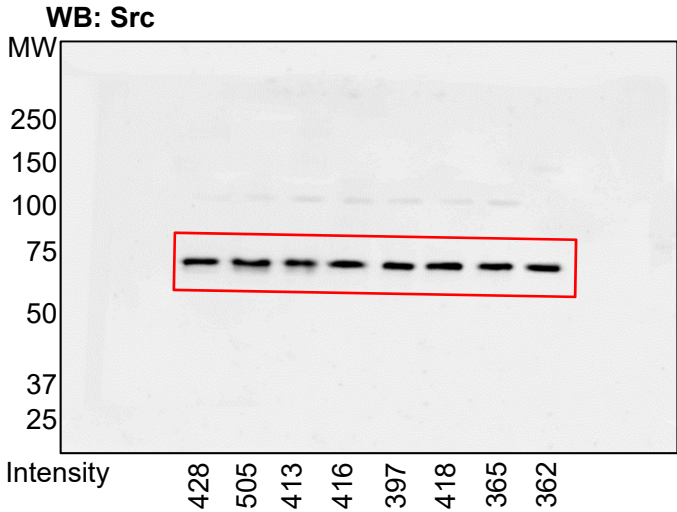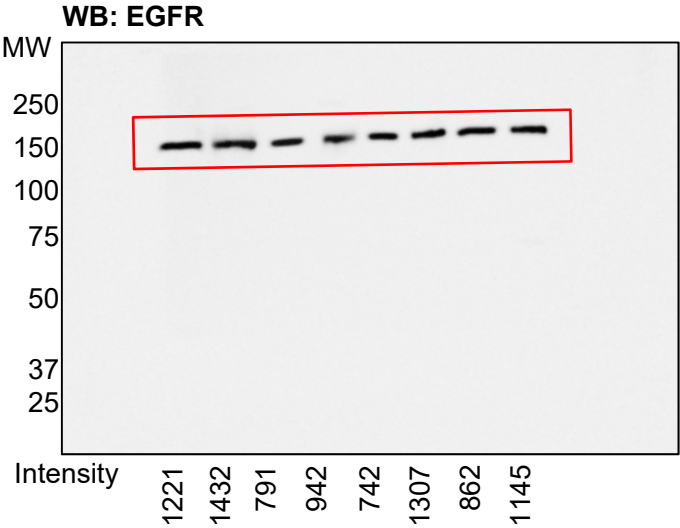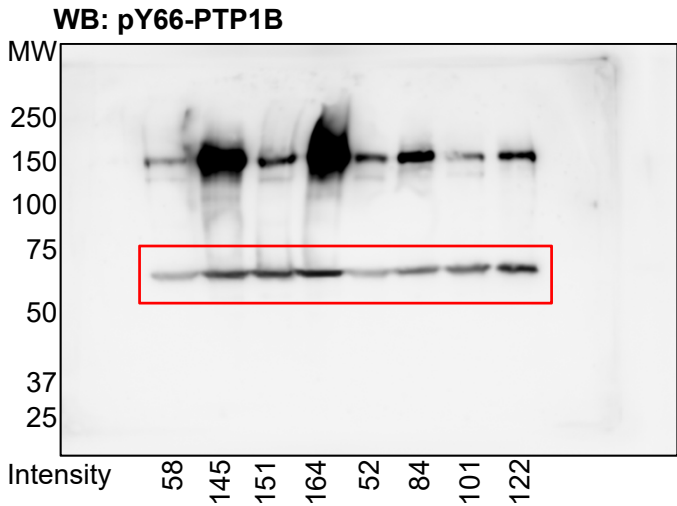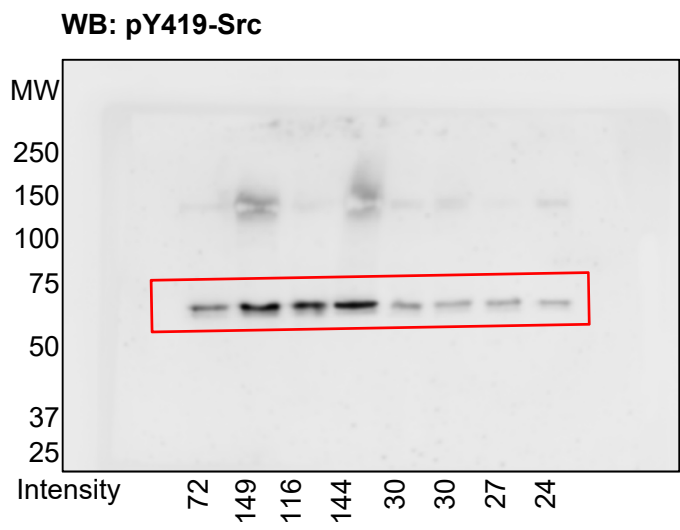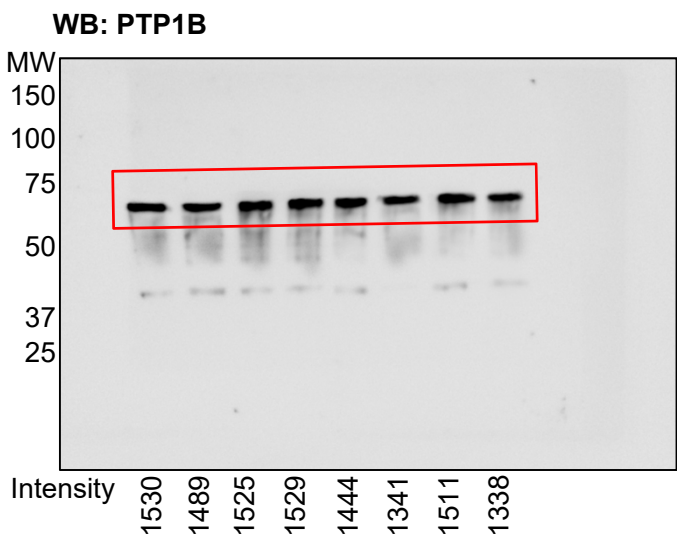



**Figure 6B (left)**

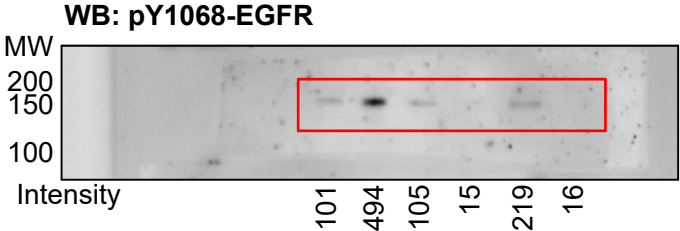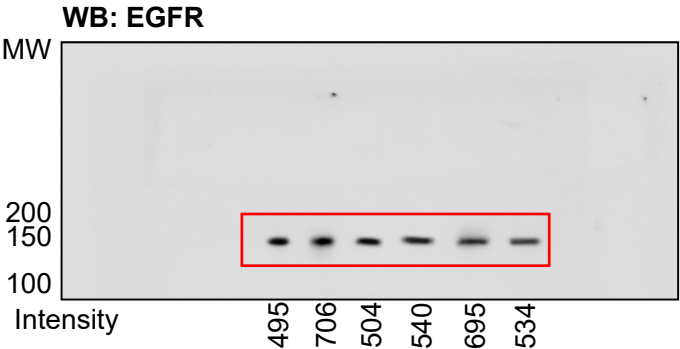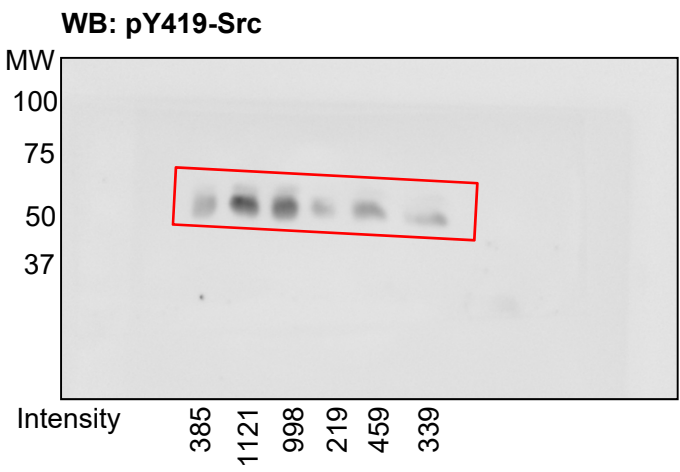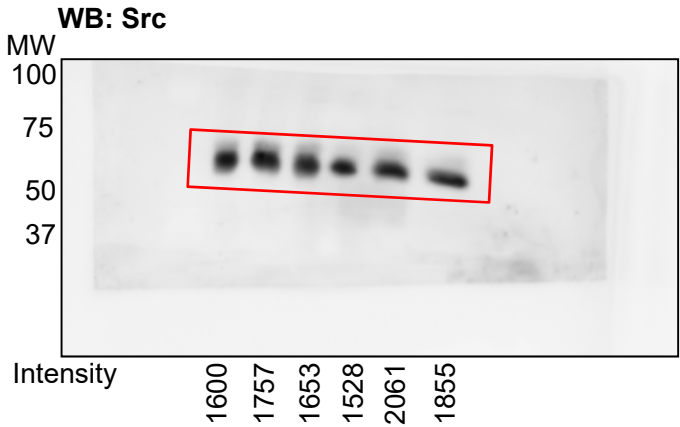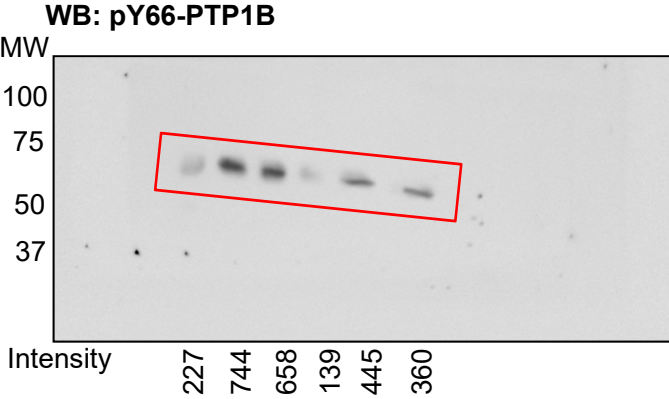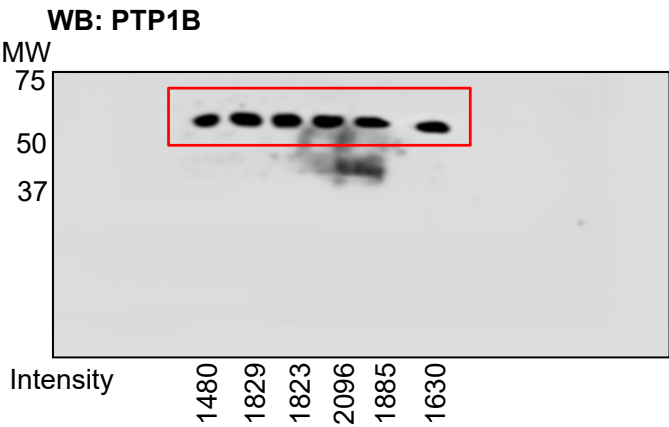

**Figure 6B (center)**

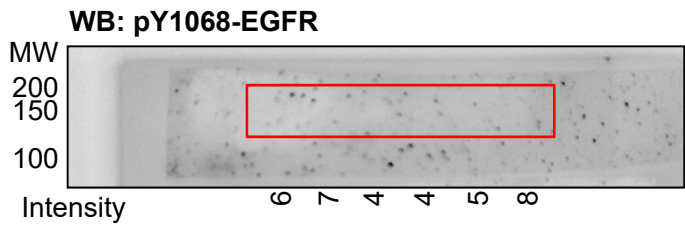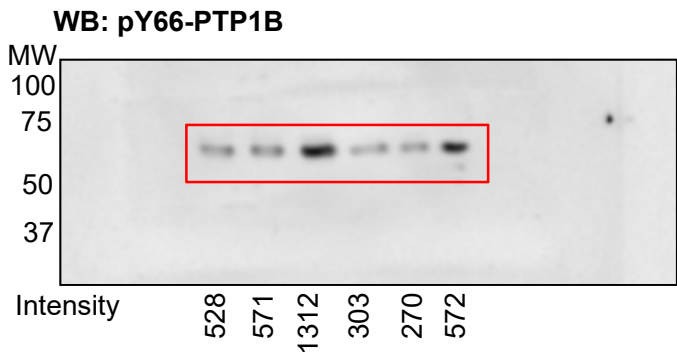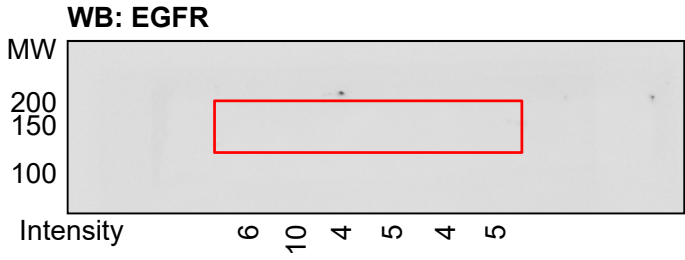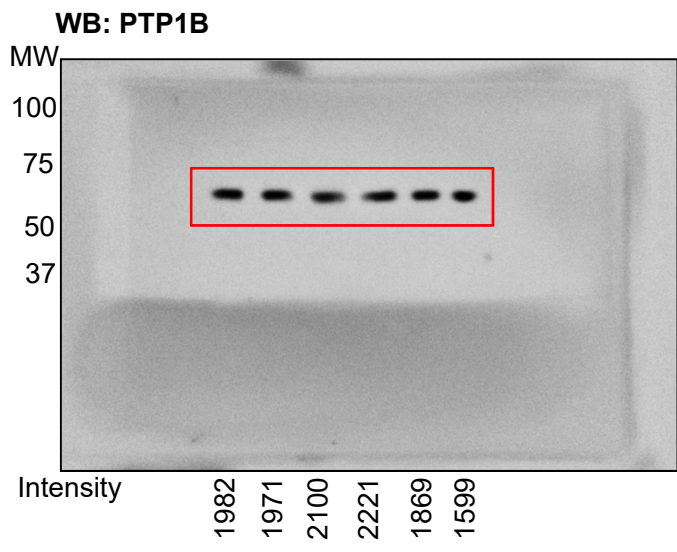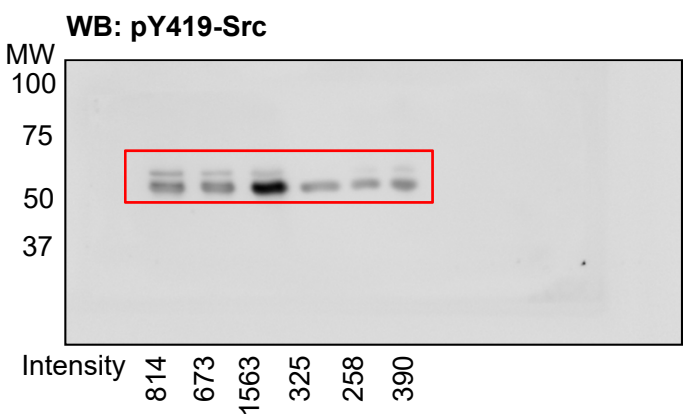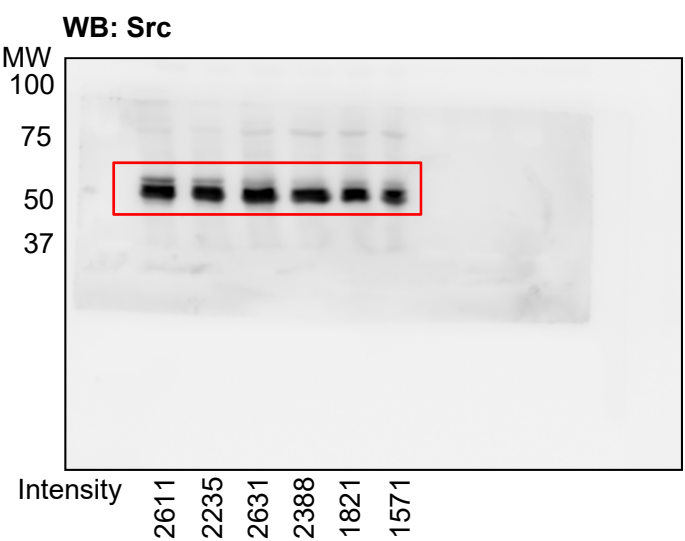

**Figure 6B (right)**

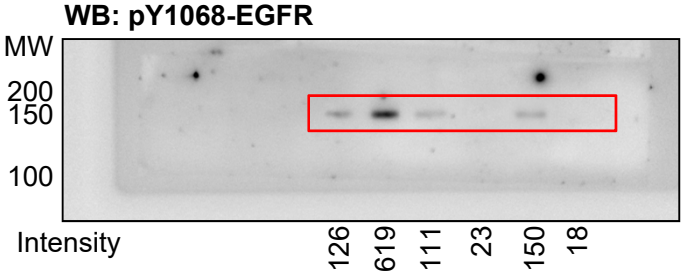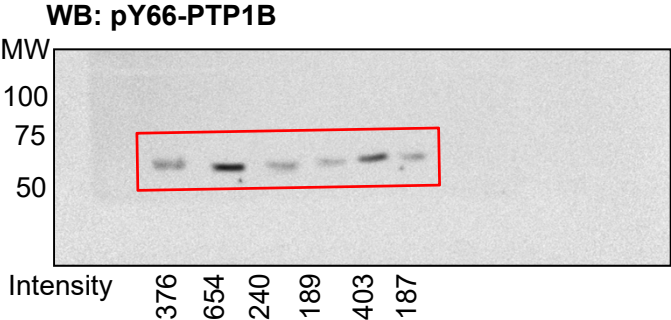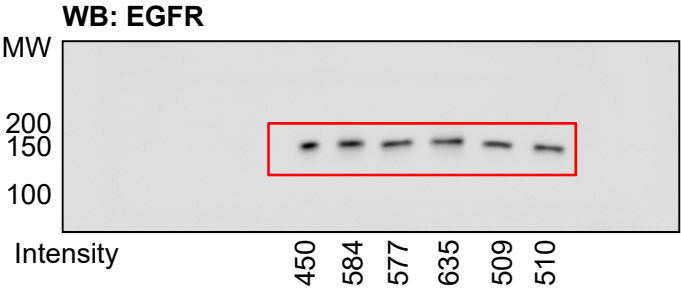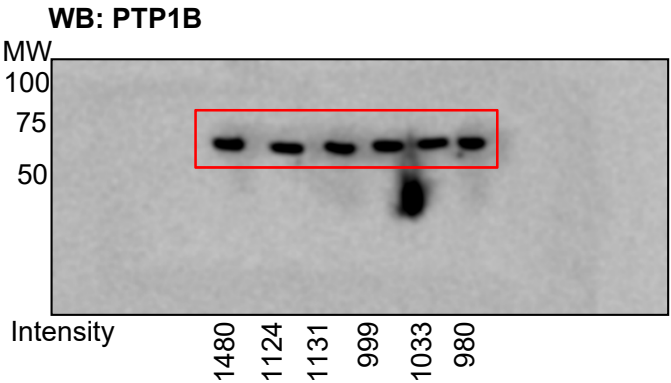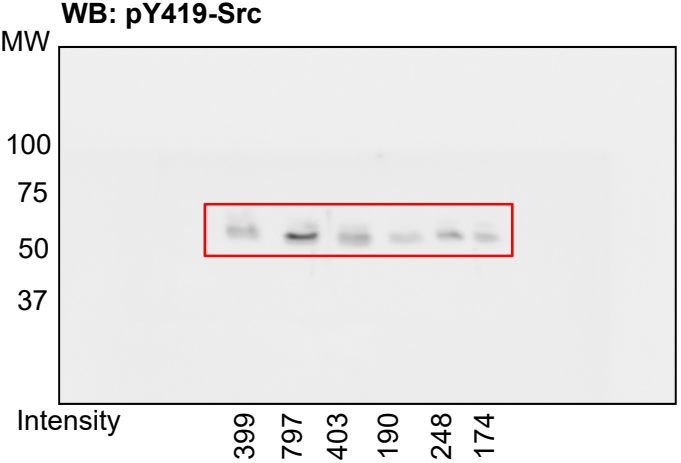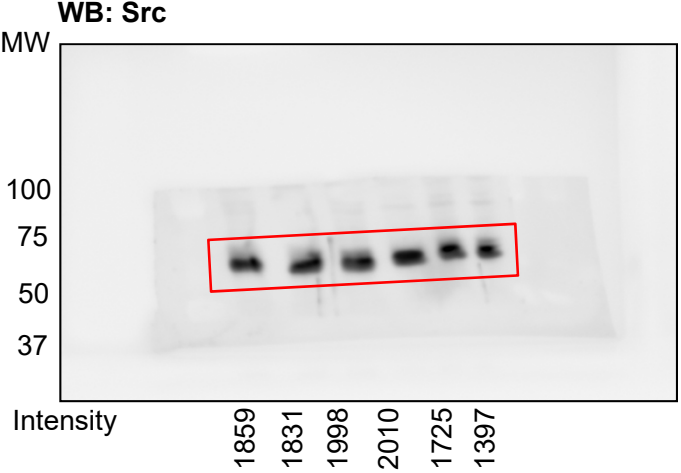

Supplement: s1 [file s1]
